# Supplementary material
Source: PubMed Central journal article supplement (PMC2995449)

### Supplementary Data

**Supplementary Figure S1.** (A) Ras activity in the cells with or without expressing *v-ras* was analyzed by the Active Ras Pull-Down and Detection kit. (B) PKC expression in the cells was analyzed by immunoblotting using anti-pan-PKC antibody. The evenly loading of total proteins was normalized by actin. (C) Lysates from untreated or treated cells were immunoprecipitated with anti-pan-PKC antibody. The immunocomplexes were incubated with [<sup>32</sup>P]γ-ATP and the peptide substrates to determine PKC activity. The error bars represent SD from 3 independent experiments (n = 3, *p* < 0.05).

**Supplementary Figure S2.** (A) and (B) After the transient introduction of *dn-* (A) or *wt-Akt* (B), the expression of tagged HA was measured by immunoblotting. Equal loading total proteins were verified by actin expression.

**A**

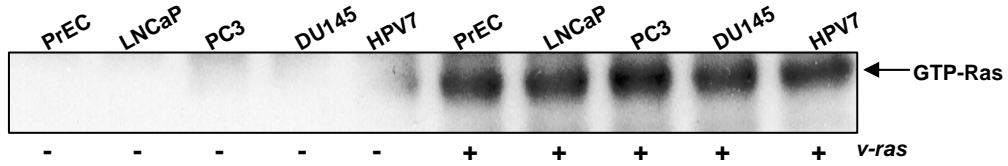

**B**

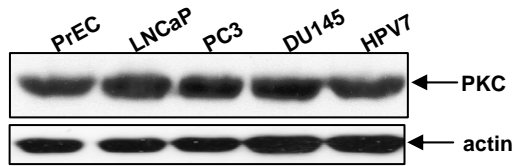

**C**

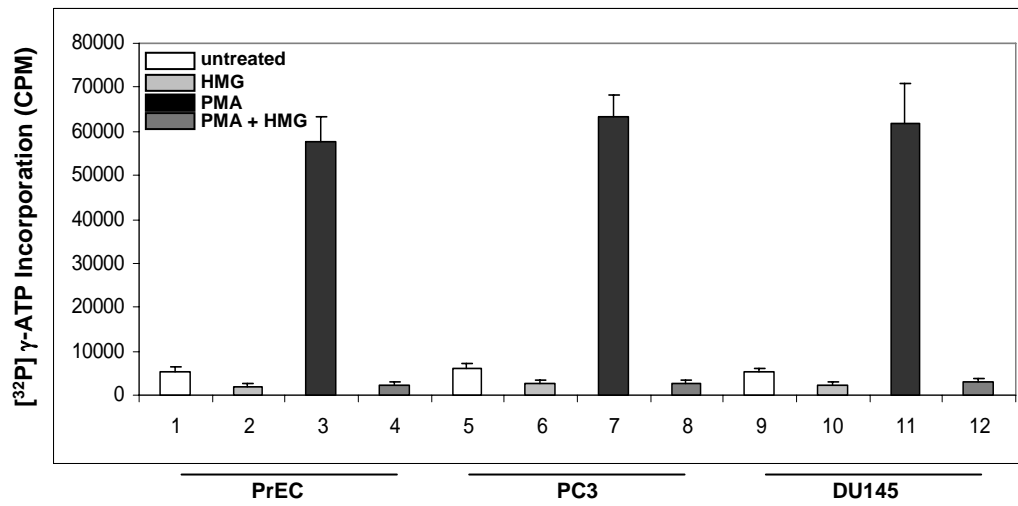

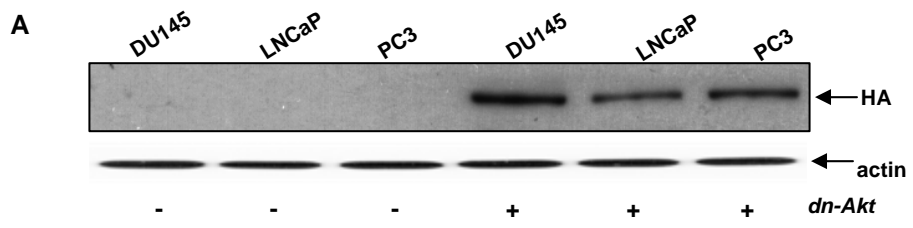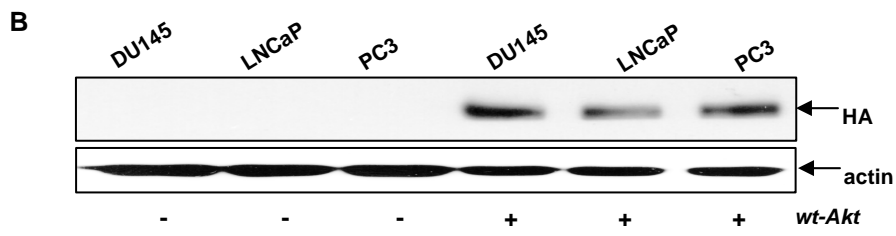

Supplement: NIHMS250555-supplement-arrays.pdf [file NIHMS250555-supplement-arrays.pdf]
